# Supplementary material for: Curcumin Mitigates Immune-Induced Epithelial Barrier Dysfunction by Campylobacter jejuni
Source: PubMed Central journal article supplement (PMC6802366; doi:10.3390/ijms20194830), 2019-09-28
Supplement: ijms-20-04830-s001.pdf [file ijms-20-04830-s001.pdf]

## Appendix A

### *Acute Campylobacteriosis Contains Activated Signaling Pathways for which Curcumin Has Counter-Regulatory Properties in IPA Analysis*

From acute infected *C. jejuni* patients a RNA-Sequencing (RNA-Seq) analysis with concomitant ingenuity pathway analysis (IPA, Qiagen Silicon Valley) was performed. Once gene expression modifications were revealed, a bioinformatic prediction about possible inhibitors of the changed gene regulation could be carried out [6]. The hypothesis is, that upstream regulators, which have an inhibited activation pattern, may re-activate in *Campylobacter* infection, when the substance is applied during infection. Consequently, inhibited upstream regulators could be protective or therapeutic approaches in *Campylobacter* infection by activation of the corresponding downstream pathways. Different potential candidates were screened for barrier-protective and anti-inflammatory properties in *C. jejuni* infection. One promising predicted regulator candidate that might counter-regulate the *C. jejuni*-induced downstream pathways was curcumin. Curcumin showed a significant effect on downstream target genes, with a  $p$ -value of  $2.06E^{-5}$  and an activation  $z$ -score of  $-3.489$ , and might therefore be another promising barrier-protecting or potential therapeutic substance in campylobacteriosis (Table S1). The *C. jejuni*-induced target genes in the dataset that could be counter-regulated by curcumin belong mainly to pro-inflammatory pathways, such as TNF- $\alpha$  or IL-1 $\beta$ . Another promising and studied candidate against *C. jejuni* infections is calcitriol (active vitamin D). Vitamin D shows in the RNA-Seq analysis with concomitant IPA analysis from patients in contrast to curcumin an even higher significance value (overlap  $p$ -value of  $8.97E^{-25}$ ,  $z$ -score  $-6.25$ ; with negative expression direction) [6].

**Table S1.** Curcumin is an upstream regulator in *C. jejuni*-infected human mucosa identified by IPA

| Upstream Regulator | Predicted Activation | Activation Z-Score | $p$ -Value of Overlap | Target Molecules in Dataset                                                                                                                                                                                                                                                                                                                                                                                                                                    |
|--------------------|----------------------|--------------------|-----------------------|----------------------------------------------------------------------------------------------------------------------------------------------------------------------------------------------------------------------------------------------------------------------------------------------------------------------------------------------------------------------------------------------------------------------------------------------------------------|
| curcumin           | inhibited            | -3.489             | $2.06E^{-5}$          | ABCB1,ABCC1,ABCG1,ADAMTS4,ADIPOQ,APOE,ATOX1,AXIN1,BIRC3,BIRC5,CCNB1,CD44,CD80,CD86,CDK1,CDK4,CR1,CRP,CSNK1A1,CTGF,CXCL1,CXCL3,CXCL8,CXCR3,CXCR4,CYP2E1,CYP3A4,DDIT3,EDN1,EGFR,EIF3H,ERBB2,ETS1,FOS,FTL,GCLM,GFAP,GRIN2B,GRK6,HIF1A,HSP90B1,HSPA8,ICAM1,IFNG,IL17A,IL1B,IL6,JUN,LPL,LSP1,MMP1,MMP14,MMP3,MMP9,MTHFD1,NAMPT,NOS2,OLR1,PLAU,PPARGC1A,PRAP1,PRPS2,SELE,SERPINE1,SOCS1,SOCS3,SOD1,STAT3,TFAM,TFR2,TLR2,TLR4,TNF,TOP1,TOP2A,UBE2E2,UCP2,VEGFA,ZMYND8 |

*Subcellular Tight Junction Protein Distribution in Co-Cultures in Confocal Laser-Scanning Microscopy*

Curcumin alone showed no influence on the subcellular tight junction distribution of claudin-4 and claudin-8 in comparison to the untreated control (Figure S2).

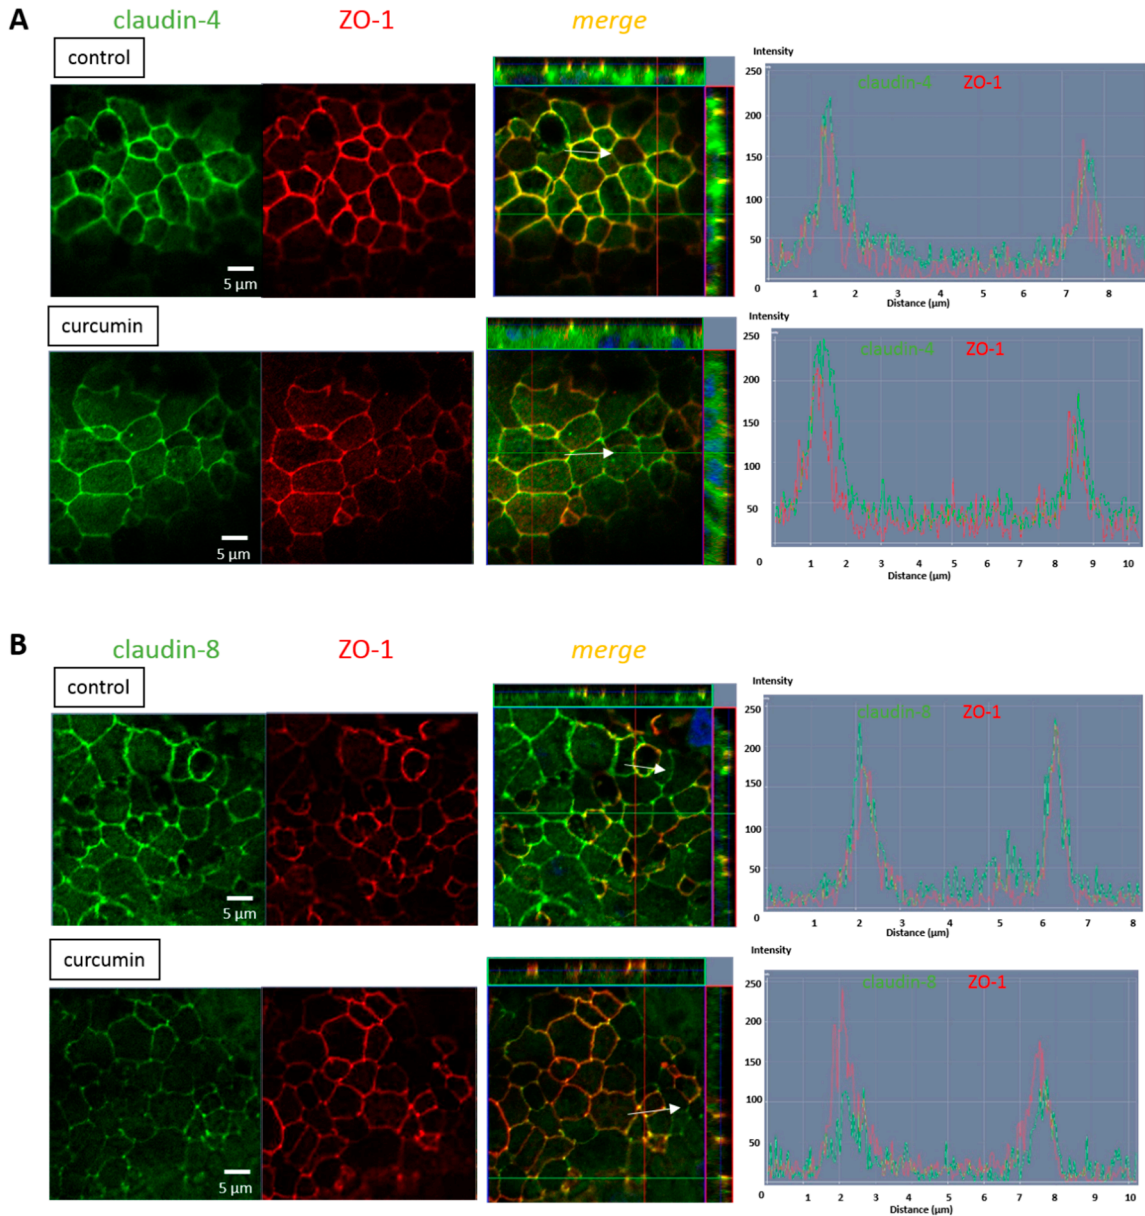

**Figure S2.** Tight junction distribution in control conditions after treatment without or with 50  $\mu\text{M}$  curcumin. Representative confocal laser-scanning microscopy pictures of HT-29/B6-GR/MR after co-culturing together with immune cells. (A) Claudin-4 (green) and zonula occludens protein-1 (ZO-1, red), and (B) claudin-8 (green) and ZO-1 (red). Nuclei are stained in blue with 4'-6-diamidino-2-phenylindole dihydrochloride (DAPI).
